# Supplementary material for: Clinical utility of C-reactive protein to predict treatment response during cystic fibrosis pulmonary exacerbations
Source: PLoS One. 2017 Feb 8;12(2):e0171229. doi: 10.1371/journal.pone.0171229 (PMC5298271; doi:10.1371/journal.pone.0171229)
Supplement: S1 Dataset — (XLSX) [file pone.0171229.s001.xlsx]

## Sheet: Final for Analysis_Full Data
time_admit_to_crp	crp_0	crp_f	crp5	crp_0_to_5_pct_change	days_hosp	home_iv	abx_switch	confirmed switch notes	day_abx_switch	abx_switch_tf	wbc_0	wbc_d	wbc_f	hosp_notes	fu_fev1	num_IV_exac_yr_prior	pa	mssa	mrsa	bcc	steno	achrom	ecoli	ntm	asp	scedo	normal	other	pred_dose	abx_6_start	abx_6_end	run_tim6	tobra	coli	mero	ceftaz	piptaz	clox	vanco	aztreo	septra	other_abx	baseline_fev1	admit_fev1	dis_fev1
8.25	51.1	12.3	34.2		14.5806	0					10.2	8.7	8.7				1	1														0	1	0	0	1	0	0	0	0			46	37	45
10.433	80.7	20.3	23.8		19.9903	0	2	switch: reaction to immunization			9.1	8.8	8.8				1															0	1			1							37		36
5.5	111.4	6.1	14.3		13.3674	0					14.1	8	8				1															0		1	1								36	29	32
7.15	209.9	8.4	26.5		13.4882	0					11.6		11.6				1															0		1		1							36	23	33
16.5	185.8	8.5	34.1		14.3243	0					10.9	7.8	7.8				1															0			1					1			37	22	33
19.75	98.9	12.4	34.1		12.4194	0					10.1	7.1	7.1				1															0			1	1							36	25	31
4.15	36.3	1	9.4		14.35	0					10.2	11.8	11.8				1	1														0	0	0	1	1	0	0	0	0			48	38	39
5.6	117	4.5	136.5		21.3903	0					8.7		4.8				1	1							1							0				1	1						44		40
10.8	22.3	1.2	9.3		14.8944	0					9.5	4.3	4.3		71			1		1				1	1							0	0	0	1	1	0	0	0	0			78	61	75
3	4.5	1	0.7		13.6056	0					9.5	4	4					1		1					1							0			1	1							75	68	79
7.2	45.1	5	11.5		18.4771	0					10.1	7.1	7.1				1	1														0	0	1	1	0	0	0	0	0			36	26	35
4.41667	25.1	3.2	3.3		20.3451	0					10.7	8.6	8.6		42		1															0	1	0	0	0	0	0	0	1			43	39	40
3.3	57.2	4.5	12.5		13.3187	0					13.2	10.7	10.7				1															0	1							1			42	35	38
4.42	46.5	17.5	13.3		17.0701	0					12.7	9.1	9.1				1											Haemophilus influenzae				0	1		1								33	33	36
7.06667	1.1	2.5	4.6		13.4681	0					9.8	8.1	8.1				1								1							0	1	0	0	1	0	0	0	0			98	81	91
4.5	1.5	2	8.6		15.3111	0	2	switch: rash			10.3		4.9				1								1							0	1		1								98		94
	0.6	4	0.6		19.4812	0					16	5.7	5.7				1								1				25mg			0	1							1			94	79	91
6.2	2.1	1.5	4.9		12.5271	0					9	5.1	5.1				1								1							0	1							1			104	81	95
16.15	1.2	0.6	2.7		13.3097	0					6.6	7.9	7.9				1								1							0				1							80	88	100
	3.8	2.9	1.8		9.23333	1					5.2		9				1															0	1	0	0	0	1	0	0	0			71	63	77
	15.5	0.7	3.5		13.4396	0					9.9	7.7	7.7				1	1														0	1				1						74	67	68
18.16	8.8	0.9	3		12.4104	0					11.1	9.4	9.4				1															0	1				1						71		52
18.2833	222.3	15.9	15.9		5.45417	1					14.4		9.9	initially planned 3 weeks of antibiotic therapy but cut short due to acute kidney disease; exacerbation imporved though	27		1															0	0	0	1	1		0	0	0			23	22	25
5.25	32.8	2.3	3.5		13.3819	0					12.2	7.4	7.4		37		1	1	1													0	1	0	0	0	1	0	0	0			40	37	45
5.7667	64.7	1.9	3.8		13.3792	0					11.2	7.1	7.1				1		1													0								1			42	25	37
4.11667	20	3.7	4.9		13.3417	0					13.8	7.2	7.2						1													0	1							1			40		37
4.7	4.2	0.1	0.6		12.5035	0					9.8	5.5	5.5		92			1							1							0	1	0	1	0	0	0	0	0			90	90	101
7.2167	1.6	0.4	0.4		7.34514	0					6.5		6.2					1							1							0	1		1								94		92
3.01667	80.4	5.2	62.5		41.1986	0	2	switch: elevated liver enzymes + tinnitus			13.8	9.2	9.2	all antibiotics were stopped due to intolerance (liver enzymes + tinnitus); later started on colistin + piptazo but both had to be stopped; slight improvement from azteronam; tried colistin again but failed			1															0	1		0	0		0	0	1			35	35	34
8.9	200.1	2.7	28.1		14.4993	0					9.5		7.4														1					0	1			1							34	34	38
1.7833	165.2	0.9	48.1		20.4792	0	1	switch: no clinical improvement	10	1	13.1	7.6	7.6				1	1														0		1		1							44		39
4.5	102.1	6.5	13.9		20.2792	0					14.6	9.8	9.8		35				1						1							0	0	0	1	0	0	0	1	0			46	33	42
0.433333	170.4	8.4	19.9		13.3389	0					16.6	8.4	8.4		47			1														0	0	0	1	1	0	0	0	0			50	44	46
8.21667	27.6		8.3		6.46736	1					11.2		2.5					1			1											0			1	1							50	45	43
3.65	39.1	20.4	10.6		20.3049	0	1	switch: CRP increased again	12	1	16.2	14.2	14.2				1															0	0	1	1	0	0	0	0				37		41
	75.2	43.7	20.2		19.5361	0		switch: intolerance			19	10	10				1															0			1					1			41	37	42
3.15	2.5	5.1	5.1		13.4	0	2	switch: to cover growth of pseudomonas			9.8		7.1	piptazo added to cover growth of pseudomonas	74				1													0	0	0		0	1	0	1	0			76	75	71
5.61666	1.6	2.4	18.4		13.4125	0					10.3		13.6						1													0					1		1				71		68
6.38333	2.3	1.9	3.3		12.4326	0					9.4		9.3						1													0					1		1				71	69	71
2.95	9	2.1	5.9		13.4007	0					6.4	5.1	5.1	started on ivacaftor and antifungal stopped	42		1															0	1	0	0	1	0	0	0	0			48		38
4.8	18.1	9.5	23.4		13.3819	0					8	3.6	3.6				1									1						0	1				1						46	42	44
20.75	34.9	6.9	42		21.5236	0	1	switch: no improvement	14	1	3.2	4.5	4.5				1						1									0		1		1							44		42
16.1167	36.9	2.7	12.6		14.3375	0					15.9	15.2	15.2							1												0	0	0	1	0	1	0	0	0			24	20	23
4.0333	96.4	58.3	28.3		13.3611	0					21.5	15.6	15.6							1								Serratia marcescens				0				1				1			25	17	22
3.81667	57.2	8	8		6.35	1					17.4		9.5		55		1															0	0	0	1	1	0	0	0	0			53	32	48
11.5667	22.4	36	7.9		14.1417	0					10.1		12.2	ABPA - started on Pred and Itraconazole upon discharge	93			1											50mg			0	1	0	0	1	0	0	0	0		itraconazole	105	57	67
4.98333	5.8	4.4	8.7		9.37431	0					12.7	8.5	8.5		81				1									Enterobacter				0	0	0	0	0	1	0	1	0			80	60	76
6.45	2.2	0.3	0.3		13.4424	0					10.7		8.1		115		1	1														0	1	0	0	1	0	0	0	0			97	106	113
	0.5	0.4	0.4		13.5833	0					13.4	8.3	8.3				1	1														0	1			1							113		119
17.7333	27.1	1.1	2.7		20.2924	0					5.3	7	7	dios in hospital	63		1											Influenza A				0	1	0	1	0	0	0	0	0		tamiflu	67	45	59
20.9	7.1	1.5	2.1		12.5042	0	2	switch: rash			7.6	7.9	7.9	septra rash in hospital	43		1				1				1							0	1	0	0	1	0	0	0	0	1		42	42	46
4.38333	4.9	2	4.7		14.3653	0	2	switch: headache			10.7	6.2	6.2	had a migrane	43		1															0	0	1	1	1	0	0	0	0			44	33	39
3.8333	2.6	2.9	5.3		14.3368	0					9.1	6.1	6.1				1															0			1	1							45	44	45
6.5	8.9	2	3.6		13.375	0					9.2	5	5		42		1											pandoraea apista				0	0	1	0	1	0	0	0	0			52	40	41
1.41667	15.3	11.1	8.7		13.2292	0					10.9	6.4	6.4				1											wangiella dermatitidis				0		1		1							47	34	42
21.6	8.2	8.5	10.4		13.259	0					8.6	5.6	5.6				1															0		1		1							42	35	40
6.4333	78.1	6.8	9.7		17.3722	0					9.9	8.6	8.6				1															0		1		1							42		36
5.16667	29.2	6.1	36.2		13.3819	0	2	switch: reaction			13.7	9.8	9.8				1															0		1			1						40	35	38
4.96667	12	4.2	5		20.3819	0					13	8.2	8.2				1															0	1	0	1	0	0	0	0	0			50		48
3.53333	79.3	16	9		13.3403	0					16.4	10.5	10.5				1					1										0	0	0	1	1	0	0	0	0			29	26	27
	32.1	3.9	6.1		14.3688	0					16.5	10.4	10.4				1					1										0				1	1						28		27
	36.6	21.2	14.7		13.3979	0					14.8	10	10				1					1										0	1		1								26	24	27
	28.6	5.7	19.4		14.3493	0					17.7	12.5	12.5				1															0	1			1							27	22	27
5.9	36	4.6	9.3		14.2979	0					12.2	5.6	5.6		42			1	1			1		1				bordetella hinzii				0	0	0	0	1	0	0	1	0			43	36	42
9.5	17.5	3.1	6.9		11.0514	0					10.9	8.6	8.6		76		1															0	1	0	0	1	0	0	0	0			75	70	77
	99.5	9.6	30.4		18.9347	0					16.2	9.4	9.4				1	1														0			1	1							57		48
14.2167	4.1	12.1	24.6		13.2556	0					4.4	6.8	6.8		65			1			1			1				Enterobacter				0	0	0	1	0	1	0	0	0			66	56	65
	17.4	8.1	10		14.3285	0					7.1		5.6					1			1			1								0			1	1							65	57	63
1.15	25.1	8.3	2.5		13.3812	0					9.7	13.2	13.2		97												1		20mg			0	0	0	0	0	0	0	1	0		ceftriaxone (IV)	99	93	90
	3.4	2.5	3		12.3847	0	2	switch: for mouth infection? Only removal of abx			15.6		18.4														1		50mg			0			1				1			ceftriaxone (IV)	95	72	83
4.83333	40.3	7.4	34.9		15.3951	0	2	switch to cover a resistant org			9.5	6.2	6.2		37								1	1		1		NTM (M. bolletti)				0	0	0	1	0	0	0	0	0		ceftriaxone (IV)	38	29	37
2.9	10.4	1.4	1.9		9.30833	0					9.1	10.2	10.2	good respose - dis early + started on po abx				1							1							0	0	0	0	1	1	0	0	0			96	91	99
4.45	3.2	4.5	3.1		12.3792	0					8.3	6.6	6.6				1															0	1	0	1	0	0	0	0	0			33	34	27
7.883	87.7	1.6	43.7		12.9951	0					12.5	7.3	7.3				1		1													0	0	1	0	0	0	0	0	1			42	40	42
5.75	27.2		7.6		6.43264	1					5.9		8.4		86												1					0	1	0	0	1	0	0	0	0			84	73	86
20.43	12.5	10	11		13.4285	0					9.8	10.5	10.5		21		1							1								0	0	0	0	1	0	0	1	1			33	23	26
	76.3	2.4	13.5		19.4	0	2	switch: liver enzymes			18.1		8.9				1															0	1		1								21	14	23
3	32	1	2.7		14.3264	0					9.8	11.9	11.9		48		1															0	1	0	1	0	0	0	0	0			50	39	49
17.17	0.9	2	0.6		13.4132	0					6.3	7.4	7.4				1															0	0	0	1	1	0	0	0	0			79	84	92
	49	7.2	19		14.2951	0					8	6.7	6.7					1											50mg			0			1			1					55	60	65
	64.5	2.2	5.8		18.5653	0	1	switch: lack of improvement	13	1	12.4		8.2				1	1								1						0		1			1						75		51
	19.7	2.5	41.3		15.3493	1	1	switch: lack of improvement	8	1	8.2	7.3	7.3				1		1											2015-04-22	2015-05-11	19		1	1	1							75	52	70
	0.6	0.4	0.4		14.409	0					8.6	5.7	5.7				1															0	1			1							68	68	84
